# Supplementary material for: Batch and Flow Synthesis of CeO2 Nanomaterials Using Solid-State Microwave Generators
Source: MDPI journal article supplement (doi:10.3390/molecules27092712), 2022-04-22
Supplement: s1 [file s1]

# ELECTRONIC SUPPLEMENTARY MATERIAL

## BATCH AND FLOW SYNTHESIS OF $\text{CeO}_2$ NANOMATERIALS USING SOLID STATE MICROWAVE GENERATORS.

Cristina Rodríguez-Carrillo, Juan Torres García, Miriam Benítez, Jamal El Haskouri, Pedro

Amorós and Jose V. Ros-Lis

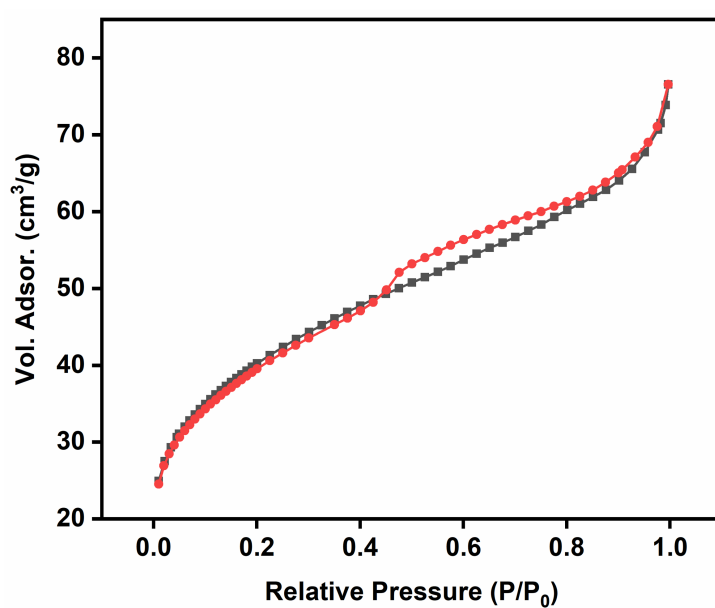

Figure S1:  $\text{N}_2$  adsorption-desorption isotherms of the material NCB12H.
